# Supplementary material for: Identification of Fish Species and Targeted Genetic Modifications Based on DNA Analysis: State of the Art
Source: MDPI journal article supplement (doi:10.3390/foods12010228), 2023-01-03
Supplement: s1 [file s1]

# **Identification of fish species and its targeted genetic modifications based on DNA analysis: state of the art**

Čermáková Eliška<sup>a,b</sup>, Lencová Simona<sup>a</sup>, Mukherjee Subham<sup>b,c</sup>, Horká Petra<sup>c</sup>, Vobruba Šimon<sup>b</sup>, Demnerová Kateřina<sup>a</sup>, Zdeňková Kamila<sup>a</sup>

<sup>a</sup>Department of Biochemistry and Microbiology, University of Chemistry and Technology, Prague, Technická 5, 166 28 Prague 6, Czech Republic.

<sup>b</sup>Department of Chemistry, Biochemistry and Food Microbiology, Food Research Institute Prague, Radiová 1285/7, 10231 Prague 10, Czech Republic.

<sup>c</sup>Institute for Environmental Studies, Charles University, Faculty of Science, Benatska 2, 128 01 Prague 2, Czech Republic.

Supplementary Table S1

**Supplementary Table S1:** Genome attributes data for the sequenced members of 15 fish orders containing commercially significant species. The number of species for which whole genome and mtDNA sequences are available is listed under the name of order.

| Order                                                              | Family              | Species                         | Year | Chr <sup>a</sup> | Size (Mb) | Source <sup>b</sup> |
|--------------------------------------------------------------------|---------------------|---------------------------------|------|------------------|-----------|---------------------|
| <b>Salmoniformes</b><br><br>WGS - 15 species<br>mtDNA - 78 species | <b>Salmonidae</b>   | <i>Coregonus</i> sp. 'balchen'  | 2020 | 40               | 2068      | GB                  |
|                                                                    |                     | <i>Coregonus clupeaformis</i>   | 2021 | 40               | 2753      | GB                  |
|                                                                    |                     | <i>Hucho hucho</i>              | 2018 | NA               | 2487      | GB                  |
|                                                                    |                     | <i>Salvelinus alpinus</i>       | 2018 | 39               | 2170      | GB                  |
|                                                                    |                     | <i>Salvelinus namaycush</i>     | 2020 | 42               | 2346      | GB                  |
|                                                                    |                     | <i>Salvelinus</i>               | 2020 | 39               | 2169      | ENA                 |
|                                                                    |                     | <i>Oncorhynchus tshawytscha</i> | 2017 | 34               | 2425      | GB                  |
|                                                                    |                     | <i>Oncorhynchus kisutch</i>     | 2017 | 30               | 2369      | GB                  |
|                                                                    |                     | <i>Oncorhynchus nerka</i>       | 2019 | 29               | 1927      | GB                  |
|                                                                    |                     | <i>Oncorhynchus mykiss</i>      | 2014 | 29               | 2179      | GB                  |
|                                                                    |                     | <i>Oncorhynchus keta</i>        | 2020 | 37               | 1853      | GB                  |
|                                                                    |                     | <i>Oncorhynchus gorbuscha</i>   | 2021 | 27               | 2690      | GB                  |
|                                                                    |                     | <i>Salmo salar</i>              | 2011 | 29               | 2966      | GB                  |
|                                                                    |                     | <i>Salmo trutta</i>             | 2019 | 40               | 2371      | GB                  |
|                                                                    |                     | <i>Thymallus thymallus</i>      | 2019 | 51               | 1564      | GB                  |
| <b>Scombriformes</b><br><br>WGS - 7 species<br>mtDNA - 80 species  | <b>Scombridae</b>   | <i>Thunnus thynnus</i>          | 2018 | NA               | 648       | GB                  |
|                                                                    |                     | <i>Thunnus orientalis</i>       | 2013 | NA               | 787       | GB                  |
|                                                                    |                     | <i>Thunnus albacares</i>        | 2018 | NA               | 728       | GB                  |
|                                                                    |                     | <i>Thunnus maccoyii</i>         | 2021 | 24               | 782       | GB                  |
|                                                                    |                     | <i>Scomber colias</i>           | 2021 | NA               | 814       | GB                  |
|                                                                    |                     | <i>Euthynnus affinis</i>        | 2021 | NA               | 758       | GB                  |
|                                                                    | <b>Stromateidae</b> | <i>Pampus argenteus</i>         | 2014 | NA               | 350       | GB                  |

|                                                                 |                    |                                    |      |    |      |    |
|-----------------------------------------------------------------|--------------------|------------------------------------|------|----|------|----|
| <b>Esociformes</b>                                              | <b>Esocidae</b>    | <i>Esox lucius</i>                 | 2014 | 25 | 941  | GB |
|                                                                 |                    | <i>Esox niger</i>                  | 2021 | NA | 860  | GB |
|                                                                 |                    | <i>Esox masquinongy</i>            | 2021 | NA | 1138 | GB |
| WGS - 6 species<br>mtDNA - 9 species                            | <b>Umbridae</b>    | <i>Novumbra hubbsi</i>             | 2021 | NA | 756  | GB |
|                                                                 |                    | <i>Dallia pectoralis</i>           | 2021 | NA | 856  | GB |
|                                                                 |                    | <i>Umbra pygmaea</i>               | 2021 | NA | 1950 | GB |
| <b>Gadiformes</b><br><br>WGS - 28 species<br>mtDNA - 21 species | <b>Gadidae</b>     | <i>Gadus morhua</i>                | 2011 | 23 | 670  | GB |
|                                                                 |                    | <i>Gadiculus argenteus</i>         | 2018 | NA | 397  | GB |
|                                                                 |                    | <i>Trisopterus minutus</i>         | 2018 | NA | 335  | GB |
|                                                                 |                    | <i>Melanogrammus aeglefinus</i>    | 2018 | NA | 653  | GB |
|                                                                 |                    | <i>Merlangius merlangus</i>        | 2018 | NA | 424  | GB |
|                                                                 |                    | <i>Gadus chalcogrammus</i>         | 2018 | NA | 449  | GB |
|                                                                 |                    | <i>Pollachius virens</i>           | 2018 | NA | 395  | GB |
|                                                                 |                    | <i>Arctogadus glacialis</i>        | 2018 | NA | 429  | GB |
|                                                                 |                    | <i>Boreogadus saida</i>            | 2018 | NA | 412  | GB |
|                                                                 | <b>Phycidae</b>    | <i>Phycis phycis</i>               | 2018 | NA | 346  | GB |
|                                                                 |                    | <i>Phycis blennoides</i>           | 2018 | NA | 417  | GB |
|                                                                 | <b>Lotidae</b>     | <i>Lota lota</i>                   | 2018 | NA | 397  | GB |
|                                                                 |                    | <i>Brosme brosme</i>               | 2018 | NA | 413  | GB |
|                                                                 |                    | <i>Molva molva</i>                 | 2018 | NA | 437  | GB |
|                                                                 | <b>Macrouridae</b> | <i>Malacocephalus occidentalis</i> | 2018 | NA | 350  | GB |
|                                                                 |                    | <i>Macrourus berglax</i>           | 2018 | NA | 400  | GB |
|                                                                 |                    | <i>Bathygadus melanobranchus</i>   | 2018 | NA | 431  | GB |
|                                                                 |                    | <i>Trachyrincus scabrurus</i>      | 2018 | NA | 370  | GB |
|                                                                 |                    | <i>Coryphaenoides rupestris</i>    | 2018 | NA | 829  | GB |
|                                                                 |                    | <i>Trachyrincus murrayi</i>        | 2018 | NA | 452  | GB |
|                                                                 | <b>Moridae</b>     | <i>Laemonema laureysi</i>          | 2018 | NA | 306  | GB |
|                                                                 |                    | <i>Mora moro</i>                   | 2018 | NA | 345  | GB |

|                                                                             |                         |                                        |      |    |      |        |
|-----------------------------------------------------------------------------|-------------------------|----------------------------------------|------|----|------|--------|
| <p><b>Cypriniformes</b></p> <p>WGS - 53 species<br/>mtDNA - 874 species</p> | <b>Muraenolepididae</b> | <i>Muraenolepis marmorata</i>          | 2018 | NA | 416  | GB     |
|                                                                             | <b>Melanonidae</b>      | <i>Melanonus zugmayeri</i>             | 2018 | NA | 433  | GB     |
|                                                                             | <b>Merlucidae</b>       | <i>Merluccius capensis</i>             | 2018 | NA | 414  | GB     |
|                                                                             |                         | <i>Merluccius polli</i>                | 2018 | NA | 401  | GB     |
|                                                                             |                         | <i>Merluccius merluccius</i>           | 2018 | NA | 401  | GB     |
|                                                                             | <b>Bregmacerotidae</b>  | <i>Bregmaceros cantori</i>             | 2018 | NA | 1144 | GB     |
|                                                                             | <b>Cyprinidae</b>       | <i>Cirrhinus molitorella</i>           | 2019 | NA | 920  | GB     |
|                                                                             |                         | <i>Cyprinus carpio</i>                 | 2014 | 50 | 1713 | GB     |
|                                                                             |                         | <i>Sinocyclocheilus rhinoceros</i>     | 2015 | NA | 1655 | GB     |
|                                                                             |                         | <i>Sinocyclocheilus anshuiensis</i>    | 2015 | NA | 1632 | GB     |
|                                                                             |                         | <i>Sinocyclocheilus grahami</i>        | 2015 | NA | 1750 | GB     |
|                                                                             |                         | <i>Carassius auratus</i>               | 2015 | 59 | 1820 | GB     |
|                                                                             |                         | <i>Labeo rohita</i>                    | 2019 | NA | 1484 | GB     |
|                                                                             |                         | <i>Poropuntius huangchuchieni</i>      | 2019 | NA | 760  | GB     |
|                                                                             |                         | <i>Labeo catla</i>                     | 2020 | NA | 1232 | GB     |
|                                                                             |                         | <i>Labeo gonius</i>                    | 2020 | NA | 738  | GB     |
|                                                                             |                         | <i>Onychostoma macrolepis</i>          | 2020 | 25 | 886  | GB     |
|                                                                             |                         | <i>Oxygymnocypris stewartii</i>        | 2018 | NA | 1849 | GB     |
|                                                                             |                         | <i>Carassius gibelio</i>               | 2021 | NA | 1931 | GB     |
|                                                                             |                         | <i>Cirrhinus cirrhosus</i>             | 2021 | NA | 1153 | GB     |
|                                                                             |                         | <i>Labeo calbasu</i>                   | 2021 | NA | 1042 | GB     |
|                                                                             |                         | <i>Puntigrus tetrazona</i>             | 2021 | 25 | 731  | GB     |
|                                                                             |                         | <i>Sinocyclocheilus anophthalmus</i>   | 2021 | NA | 1914 | GB     |
|                                                                             |                         | <i>Sinocyclocheilus maitianheensis</i> | 2021 | NA | 1680 | GB     |
|                                                                             |                         | <i>Tor tambroides</i>                  | 2022 | NA | 1235 | GB     |
|                                                                             |                         | <i>Rhodeus ocellatus</i>               | 2020 | NA | 851  | GigaDB |
|                                                                             | <b>Xenocyprididae</b>   | <i>Anabarilius grahami</i>             | 2018 | NA | 992  | GB     |
|                                                                             |                         | <i>Culter alburnus</i>                 | 2020 | NA | 1017 | GB     |
|                                                                             |                         | <i>Ctenopharyngodon idella</i>         | 2021 | 24 | 893  | GB     |

|                         |                                    |      |    |      |        |
|-------------------------|------------------------------------|------|----|------|--------|
|                         | <i>Hypophthalmichthys nobilis</i>  | 2021 | 24 | 857  | GB     |
|                         | <i>Hypophthalmichthys molitrix</i> | 2022 | NA | 825  | GB     |
|                         | <i>Megalobrama amblycephala</i>    | 2021 | 24 | 1110 | GB     |
|                         | <i>Pseudobrama simoni</i>          | 2020 | NA | 941  | GigaDB |
| <b>Danionidae</b>       | <i>Danio rerio</i> , a zebrafish   | 2005 | 25 | 1679 | GB     |
|                         | <i>Danio albolineatus</i>          | 2020 | NA | 1463 | GB     |
|                         | <i>Danio choprai</i>               | 2020 | NA | 1102 | GB     |
|                         | <i>Danio jaintianensis</i>         | 2020 | NA | 1122 | GB     |
|                         | <i>Danio tinwini</i>               | 2020 | NA | 1497 | GB     |
|                         | <i>Danio kyathit</i>               | 2020 | 25 | 1708 | GB     |
|                         | <i>Danio aesculapii</i>            | 2020 | 25 | 1381 | GB     |
|                         | <i>Danionella dracula</i>          | 2018 | NA | 665  | GB     |
|                         | <i>Danionella translucida</i>      | 2019 | NA | 735  | GB     |
| <b>Leuciscidae</b>      | <i>Leuciscus waleckii</i>          | 2016 | NA | 752  | GB     |
|                         | <i>Leuciscus idus</i>              | 2022 | 25 | 1104 | GB     |
|                         | <i>Pimephales promelas</i>         | 2014 | NA | 1219 | GB     |
|                         | <i>Abramis brama</i>               | 2022 | 25 | 1067 | GB     |
|                         | <i>Squalius cephalus</i>           | 2022 | 25 | 1040 | GB     |
|                         | <i>Rutilus rutilus</i>             | 2022 | NA | 1096 | GB     |
|                         | <i>Vimba vimba</i>                 | 2022 | 25 | 1054 | GB     |
| <b>Nemacheilidae</b>    | <i>Triplophysa siluroides</i>      | 2019 | NA | 583  | GB     |
|                         | <i>Triplophysa tibetana</i>        | 2019 | 25 | 652  | GB     |
|                         | <i>Triplophysa dalaica</i>         | 2020 | 25 | 607  | GB     |
|                         | <i>Triplophysa bleekeri</i>        | 2020 | NA | 628  | GigaDB |
| <b>Gastromyzontidae</b> | <i>Beaufortia kweichowensis</i>    | 2021 | 25 | 449  | GB     |
| <b>Gobionidae</b>       | <i>Gobio gobio</i>                 | 2022 | 25 | 1550 | GB     |
|                         | <i>Paracanthobrama guichenoti</i>  | 2021 | 25 | 1088 | GB     |
|                         | <i>Gobiocypris rarus</i>           | 2021 | 25 | 959  | GB     |
| <b>Catostomidae</b>     | <i>Myxocyprinus asiaticus</i>      | 2021 | 50 | 2581 | GB     |

|                                                                    |                        |                                                                              |      |    |      |    |
|--------------------------------------------------------------------|------------------------|------------------------------------------------------------------------------|------|----|------|----|
|                                                                    | <b>Paedocyprididae</b> | <i>Paedocypris sp. Pulau Singkep</i>                                         | 2021 | NA | 404  | GB |
| <b>Clupeiformes</b><br><br>WGS - 8 species<br>mtDNA - 97 species   | <b>Denticipitidae</b>  | <i>Denticeps clupeoides</i>                                                  | 2019 | 20 | 567  | GB |
|                                                                    | <b>Engraulidae</b>     | <i>Coilia nasus</i>                                                          | 2019 | 24 | 812  | GB |
|                                                                    | <b>Clupeidae</b>       | <i>Tenuualosa ilisha</i>                                                     | 2018 | NA | 815  | GB |
|                                                                    |                        | <i>Clupea harengus</i>                                                       | 2015 | 26 | 807  | GB |
|                                                                    |                        | <i>Sardina pilchardus</i>                                                    | 2018 | NA | 949  | GB |
|                                                                    |                        | <i>Alosa alosa</i>                                                           | 2021 | 24 | 855  | GB |
|                                                                    |                        | <i>Alosa sapidissima</i>                                                     | 2021 | 24 | 904  | GB |
|                                                                    |                        | <i>Limnothrissa miodon</i>                                                   | 2021 | NA | 581  | GB |
| <b>Cichliformes</b><br><br>WGS - 570 species<br>mtDNA - 93 species | <b>Cichlidae</b>       | <i>Oreochromis niloticus</i>                                                 | 2011 | 22 | 1006 | GB |
|                                                                    |                        | <i>Another 569 members of the order with published whole genome sequence</i> |      |    |      |    |
| <b>Perciformes</b><br><br>WGS - 128 species<br>mtDNA - 260 species | <b>Percidae</b>        | <i>Perca fluviatilis</i>                                                     | 2018 | NA | 958  | GB |
|                                                                    |                        | <i>Etheostoma spectabile</i>                                                 | 2019 | 24 | 855  | GB |
|                                                                    |                        | <i>Perca flavescens</i>                                                      | 2019 | 24 | 877  | GB |
|                                                                    |                        | <i>Sander lucioperca</i>                                                     | 2019 | NA | 900  | GB |
|                                                                    |                        | <i>Sander vitreus</i>                                                        | 2019 | NA | 783  | GB |
|                                                                    |                        | <i>Etheostoma cragini</i>                                                    | 2020 | 24 | 643  | GB |
|                                                                    |                        | <i>Percina caprodes</i>                                                      | 2020 | NA | 1012 | GB |
|                                                                    | <b>Channichthyidae</b> | <i>Chaenocephalus aceratus</i>                                               | 2018 | NA | 623  | GB |
|                                                                    |                        | <i>Chionodraco hamatus</i>                                                   | 2019 | NA | 829  | GB |
|                                                                    |                        | <i>Chionodraco myersi</i>                                                    | 2019 | NA | 1120 | GB |
|                                                                    |                        | <i>Pseudochaenichthys georgianus</i>                                         | 2020 | 24 | 1026 | GB |
|                                                                    | <b>Nototheniidae</b>   | <i>Notothenia coriiceps</i>                                                  | 2014 | NA | 637  | GB |
|                                                                    |                        | <i>Dissostichus mawsoni</i>                                                  | 2020 | NA | 926  | GB |
|                                                                    |                        | <i>Trematomus bernacchii</i>                                                 | 2020 | NA | 867  | GB |
|                                                                    |                        | <i>Trematomus loennbergii</i>                                                | 2020 | NA | 1211 | GB |

|                       |                                  |      |    |      |        |
|-----------------------|----------------------------------|------|----|------|--------|
| <b>Anarhichadidae</b> | <i>Anarrhichthys ocellatus</i>   | 2019 | NA | 613  | GB     |
| <b>Stichaeidae</b>    | <i>Cebidichthys violaceus</i>    | 2019 | NA | 593  | GB     |
| <b>Bovichtidae</b>    | <i>Cottoperca gobio</i>          | 2018 | 24 | 609  | GB     |
| <b>Serranidae</b>     | <i>Epinephelus lanceolatus</i>   | 2019 | 24 | 1087 | GB     |
|                       | <i>Epinephelus moara</i>         | 2019 | 24 | 1030 | GB     |
|                       | <i>Hypoplectrus puella</i>       | 2018 | NA | 612  | GB     |
|                       | <i>Plectropomus leopardus</i>    | 2019 | 24 | 903  | GB     |
|                       | <i>Epinephelus coioides</i>      | 2019 | NA | 1024 | GB     |
|                       | <i>Epinephelus fuscoguttatus</i> | 2020 | 24 | 1047 | GB     |
|                       | <i>Cromileptes altivelis</i>     | 2020 | 24 | 1013 | GB     |
|                       | <i>Serranus cabrilla</i>         | 2020 | NA | 631  | GB     |
|                       | <i>Cephalopholis sonnerati</i>   | 2021 | NA | 1044 | GB     |
| <b>Bathdraconidae</b> | <i>Gymnodraco acuticeps</i>      | 2020 | NA | 997  | GB     |
|                       | <i>Parachaenichthys charcoti</i> | 2017 | NA | 709  | GigaDB |
| <b>Harpagiferidae</b> | <i>Harpagifer antarcticus</i>    | 2020 | NA | 942  | GB     |
| <b>Cottidae</b>       | <i>Myoxocephalus scorpius</i>    | 2018 | NA | 520  | GB     |
|                       | <i>Cottus rhenanus</i>           | 2015 | NA | 564  | GB     |
|                       | <i>Taurulus bubalis</i>          | 2021 | 21 | 615  | GB     |
| <b>Sebastidae</b>     | <i>Adelosebastes latens</i>      | 2021 | NA | 832  | GB     |
|                       | <i>Helicolenus avius</i>         | 2021 | NA | 344  | GB     |
|                       | <i>Helicolenus hilgendorfi</i>   | 2021 | NA | 481  | GB     |
|                       | <i>Hozukius emblemarius</i>      | 2021 | NA | 834  | GB     |
|                       | <i>Hozukius guyotensis</i>       | 2021 | NA | 836  | GB     |
|                       | <i>Sebastiscus albofasciatus</i> | 2021 | NA | 787  | GB     |
|                       | <i>Sebastiscus tertius</i>       | 2021 | NA | 772  | GB     |
|                       | <i>Sebastolobus alascanus</i>    | 2021 | NA | 859  | GB     |
|                       | <i>Sebastolobus altivelis</i>    | 2021 | NA | 852  | GB     |
|                       | <i>Sebastes aleutianus</i>       | 2021 | NA | 890  | GB     |

|  |                                |      |    |     |    |
|--|--------------------------------|------|----|-----|----|
|  | <i>Sebastes alutus</i>         | 2021 | NA | 794 | GB |
|  | <i>Sebastes atrovirens</i>     | 2021 | NA | 802 | GB |
|  | <i>Sebastes auriculatus</i>    | 2021 | NA | 795 | GB |
|  | <i>Sebastes aurora</i>         | 2021 | NA | 796 | GB |
|  | <i>Sebastes babcocki</i>       | 2021 | NA | 785 | GB |
|  | <i>Sebastes baramenuke</i>     | 2021 | NA | 809 | GB |
|  | <i>Sebastes borealis</i>       | 2021 | NA | 466 | GB |
|  | <i>Sebastes carnatus</i>       | 2021 | NA | 785 | GB |
|  | <i>Sebastes caurinus</i>       | 2021 | NA | 780 | GB |
|  | <i>Sebastes ciliatus</i>       | 2021 | NA | 813 | GB |
|  | <i>Sebastes constellatus</i>   | 2021 | NA | 801 | GB |
|  | <i>Sebastes crameri</i>        | 2021 | NA | 802 | GB |
|  | <i>Sebastes dallii</i>         | 2021 | NA | 849 | GB |
|  | <i>Sebastes diaconus</i>       | 2021 | NA | 826 | GB |
|  | <i>Sebastes diploproa</i>      | 2021 | NA | 791 | GB |
|  | <i>Sebastes elongatus</i>      | 2021 | NA | 783 | GB |
|  | <i>Sebastes ensifer</i>        | 2021 | NA | 791 | GB |
|  | <i>Sebastes entomelas</i>      | 2021 | NA | 802 | GB |
|  | <i>Sebastes exsul</i>          | 2021 | NA | 790 | GB |
|  | <i>Sebastes fasciatus</i>      | 2021 | NA | 796 | GB |
|  | <i>Sebastes flavidus</i>       | 2021 | NA | 804 | GB |
|  | <i>Sebastes glaucus</i>        | 2021 | NA | 781 | GB |
|  | <i>Sebastes goodei</i>         | 2021 | NA | 766 | GB |
|  | <i>Sebastes helvomaculatus</i> | 2021 | NA | 801 | GB |
|  | <i>Sebastes hopkinsi</i>       | 2021 | NA | 845 | GB |
|  | <i>Sebastes hubbsi</i>         | 2021 | NA | 794 | GB |
|  | <i>Sebastes cheni</i>          | 2021 | NA | 781 | GB |
|  | <i>Sebastes chlorostictus</i>  | 2021 | NA | 805 | GB |
|  | <i>Sebastes inermis</i>        | 2021 | NA | 779 | GB |



|  |                               |      |    |     |    |
|--|-------------------------------|------|----|-----|----|
|  | <i>Sebastes iracundus</i>     | 2021 | NA | 813 | GB |
|  | <i>Sebastes itinus</i>        | 2021 | NA | 787 | GB |
|  | <i>Sebastes jordani</i>       | 2021 | NA | 782 | GB |
|  | <i>Sebastes joyneri</i>       | 2021 | NA | 780 | GB |
|  | <i>Sebastes kiyomatsui</i>    | 2021 | NA | 783 | GB |
|  | <i>Sebastes koreanus</i>      | 2021 | NA | 782 | GB |
|  | <i>Sebastes levis</i>         | 2021 | NA | 780 | GB |
|  | <i>Sebastes maliger</i>       | 2021 | NA | 795 | GB |
|  | <i>Sebastes matsubarae</i>    | 2021 | NA | 809 | GB |
|  | <i>Sebastes melanops</i>      | 2021 | NA | 783 | GB |
|  | <i>Sebastes melanostomus</i>  | 2021 | NA | 791 | GB |
|  | <i>Sebastes mentella</i>      | 2021 | NA | 794 | GB |
|  | <i>Sebastes miniatus</i>      | 2021 | NA | 851 | GB |
|  | <i>Sebastes minor</i>         | 2021 | NA | 776 | GB |
|  | <i>Sebastes moseri</i>        | 2021 | NA | 793 | GB |
|  | <i>Sebastes mystinus</i>      | 2021 | NA | 798 | GB |
|  | <i>Sebastes nebulosus</i>     | 2021 | NA | 788 | GB |
|  | <i>Sebastes nigrocinctus</i>  | 2013 | NA | 746 | GB |
|  | <i>Sebastes nivosus</i>       | 2021 | NA | 775 | GB |
|  | <i>Sebastes norvegicus</i>    | 2018 | NA | 718 | GB |
|  | <i>Sebastes nudus</i>         | 2021 | NA | 795 | GB |
|  | <i>Sebastes oblongus</i>      | 2021 | NA | 776 | GB |
|  | <i>Sebastes oculatus</i>      | 2021 | NA | 798 | GB |
|  | <i>Sebastes pachycephalus</i> | 2021 | NA | 791 | GB |
|  | <i>Sebastes paucispinis</i>   | 2021 | NA | 773 | GB |
|  | <i>Sebastes pinniger</i>      | 2021 | NA | 790 | GB |
|  | <i>Sebastes polyspinis</i>    | 2021 | NA | 800 | GB |
|  | <i>Sebastes proriger</i>      | 2021 | NA | 777 | GB |
|  | <i>Sebastes rastrelliger</i>  | 2021 | NA | 789 | GB |

|                       |                       |                                         |      |    |     |    |
|-----------------------|-----------------------|-----------------------------------------|------|----|-----|----|
|                       |                       | <i>Sebastes reedi</i>                   | 2021 | NA | 805 | GB |
|                       |                       | <i>Sebastes rosaceus</i>                | 2021 | NA | 960 | GB |
|                       |                       | <i>Sebastes rosenblatti</i>             | 2021 | NA | 780 | GB |
|                       |                       | <i>Sebastes ruberrimus</i>              | 2021 | NA | 778 | GB |
|                       |                       | <i>Sebastes rubrivinctus</i>            | 2021 | NA | 787 | GB |
|                       |                       | <i>Sebastes saxicola</i>                | 2021 | NA | 791 | GB |
|                       |                       | <i>Sebastes scythropus</i>              | 2021 | NA | 775 | GB |
|                       |                       | <i>Sebastes semicinctus</i>             | 2021 | NA | 794 | GB |
|                       |                       | <i>Sebastes serriceps</i>               | 2021 | NA | 784 | GB |
|                       |                       | <i>Sebastes schlegelii</i>              | 2020 | 24 | 848 | GB |
|                       |                       | <i>Sebastes steindachneri</i>           | 2021 | NA | 781 | GB |
|                       |                       | <i>Sebastes taczanowskii</i>            | 2021 | NA | 785 | GB |
|                       |                       | <i>Sebastes thompsoni</i>               | 2021 | NA | 773 | GB |
|                       |                       | <i>Sebastes trivittatus</i>             | 2021 | NA | 786 | GB |
|                       |                       | <i>Sebastes umbrosus</i>                | 2020 | 24 | 801 | GB |
|                       |                       | <i>Sebastes variabilis</i>              | 2021 | NA | 818 | GB |
|                       |                       | <i>Sebastes variegatus</i>              | 2021 | NA | 789 | GB |
|                       |                       | <i>Sebastes vulpes</i>                  | 2021 | NA | 524 | GB |
|                       |                       | <i>Sebastes wilsoni</i>                 | 2021 | NA | 807 | GB |
|                       |                       | <i>Sebastes zacentrus</i>               | 2021 | NA | 802 | GB |
|                       |                       | <i>Sebastes zonatus</i>                 | 2021 | NA | 764 | GB |
|                       | <b>Gasterosteidae</b> | <i>Apeltes quadracus</i>                | 2022 | 23 | 429 | GB |
|                       |                       | <i>Gasterosteus aculeatus aculeatus</i> | 2021 | 21 | 472 | GB |
|                       |                       | <i>Pungitius pungitius</i>              | 2019 | NA | 467 | GB |
|                       |                       | <i>Gasterosteus nipponicus</i>          | 2020 | 21 | 600 | GB |
|                       | <b>Pholidae</b>       | <i>Pholis gunnellus</i>                 | 2021 | 24 | 589 | GB |
|                       | <b>Hexagrammidae</b>  | <i>Ophiodon elongatus</i>               | 2021 | NA | 646 | GB |
| <b>Anabantiformes</b> | <b>Osphronemidae</b>  | <i>Betta splendens</i>                  | 2018 | 21 | 441 | GB |
|                       | <b>Channidae</b>      | <i>Channa argus</i>                     | 2019 | 24 | 644 | GB |

|                                                                        |                        |                                     |      |    |      |    |
|------------------------------------------------------------------------|------------------------|-------------------------------------|------|----|------|----|
| WGS - 5 species                                                        |                        | <i>Channa maculata</i>              | 2021 | 21 | 619  | GB |
| mtDNA - 27 species                                                     | <b>Anabantidae</b>     | <i>Anabas testudineus</i>           | 2018 | NA | 570  | GB |
|                                                                        | <b>Helostomatidae</b>  | <i>Helostoma temminckii</i>         | 2018 | NA | 600  | GB |
| <b>Siluriformes</b><br><br>WGS - 17 species<br>mtDNA - 174 species     | <b>Ictaluridae</b>     | <i>Ictalurus punctatus</i>          | 2016 | 29 | 783  | GB |
|                                                                        |                        | <i>Ameriurus melas</i>              | 2020 | 29 | 868  | GB |
|                                                                        |                        | <i>Noturus placidus</i>             | 2022 | NA | 896  | GB |
|                                                                        | <b>Siluridae</b>       | <i>Ompok bimaculatus</i>            | 2019 | NA | 718  | GB |
|                                                                        |                        | <i>Silurus glanis</i>               | 2020 | NA | 793  | GB |
|                                                                        |                        | <i>Silurus meridionalis</i>         | 2020 | 29 | 742  | GB |
|                                                                        | <b>Auchenipteridae</b> | <i>Ageneiosus marmoratus</i>        | 2018 | NA | 1030 | GB |
|                                                                        | <b>Sisoridae</b>       | <i>Bagarius yarrelli</i>            | 2019 | NA | 570  | GB |
|                                                                        | <b>Clariidae</b>       | <i>Clarias batrachus</i>            | 2018 | NA | 821  | GB |
|                                                                        |                        | <i>Clarias macrocephalus</i>        | 2020 | NA | 883  | GB |
|                                                                        |                        | <i>Clarias magur</i>                | 2020 | NA | 941  | GB |
|                                                                        | <b>Pangasiidae</b>     | <i>Pangasianodon hypophthalmus</i>  | 2018 | NA | 715  | GB |
|                                                                        |                        | <i>Pangasianodon gigas</i>          | 2022 | 30 | 827  | GB |
|                                                                        | <b>Bagridae</b>        | <i>Tachysurus fulvidraco</i>        | 2018 | NA | 713  | GB |
|                                                                        |                        | <i>Hemibagrus wyckioides</i>        | 2021 | 29 | 790  | GB |
| <b>Pleuronectiformes</b><br><br>WGS - 17 species<br>mtDNA - 73 species | <b>Callichthyidae</b>  | <i>Corydoras maculifer</i>          | 2021 | NA | 636  | GB |
|                                                                        |                        | <i>Corydoras sp. C115</i>           | 2021 | NA | 700  | GB |
|                                                                        | <b>Pleuronectidae</b>  | <i>Pseudopleuronectes yokohamae</i> | 2014 | NA | 548  | GB |
|                                                                        |                        | <i>Reinhardtius hippoglossoides</i> | 2019 | NA | 678  | GB |
|                                                                        |                        | <i>Hippoglossus hippoglossus</i>    | 2019 | 24 | 597  | GB |
|                                                                        |                        | <i>Hippoglossus stenolepis</i>      | 2020 | 24 | 594  | GB |
|                                                                        |                        | <i>Verasper variegatus</i>          | 2020 | 23 | 545  | GB |
|                                                                        |                        | <i>Platichthys stellatus</i>        | 2021 | 24 | 610  | GB |
|                                                                        | <b>Cynoglossidae</b>   | <i>Cynoglossus semilaevis</i>       | 2014 | 22 | 470  | GB |
|                                                                        |                        | <i>Paraplagusia blochii</i>         | 2021 | NA | 555  | GB |

|                                                                   |                        |                                       |      |    |      |    |
|-------------------------------------------------------------------|------------------------|---------------------------------------|------|----|------|----|
|                                                                   | <b>Paralichthyidae</b> | <i>Paralichthys olivaceus</i>         | 2016 | NA | 644  | GB |
|                                                                   |                        | <i>Pseudorhombus dupliciocellatus</i> | 2021 | NA | 395  | GB |
|                                                                   | <b>Scophthalmidae</b>  | <i>Scophthalmus maximus</i>           | 2018 | 22 | 525  | GB |
|                                                                   | <b>Soleidae</b>        | <i>Solea senegalensis</i>             | 2021 | 21 | 604  | GB |
|                                                                   |                        | <i>Brachirus orientalis</i>           | 2021 | NA | 630  | GB |
|                                                                   | <b>Pserrodoidei</b>    | <i>Psettodes erumei</i>               | 2021 | NA | 467  | GB |
|                                                                   | <b>Rhombosoleidae</b>  | <i>Colistium nudipinnis</i>           | 2021 | NA | 428  | GB |
|                                                                   | <b>Achiridae</b>       | <i>Trinectes maculatus</i>            | 2021 | NA | 450  | GB |
|                                                                   | <b>Bothidae</b>        | <i>Chascanopsetta lugubris</i>        | 2021 | NA | 578  | GB |
| <b>Gobiiformes</b><br><br>WGS - 13 species<br>mtDNA - 136 species | <b>Gobiidae</b>        | <i>Lesueurigobius sanzi</i>           | 2018 | NA | 810  | GB |
|                                                                   |                        | <i>Neogobius melanostomus</i>         | 2019 | NA | 1003 | GB |
|                                                                   |                        | <i>Periophthalmodon schlosseri</i>    | 2014 | NA | 679  | GB |
|                                                                   |                        | <i>Periophthalmus magnuspinnatus</i>  | 2014 | NA | 701  | GB |
|                                                                   |                        | <i>Scartelaos histophorus</i>         | 2014 | NA | 695  | GB |
|                                                                   |                        | <i>Boleophthalmus pectinirostris</i>  | 2014 | NA | 695  | GB |
|                                                                   |                        | <i>Lythrypnus dalli</i>               | 2020 | NA | 830  | GB |
|                                                                   |                        | <i>Chaenogobius annularis</i>         | 2020 | NA | 747  | GB |
|                                                                   |                        | <i>Mugilogobius chulae</i>            | 2021 | 22 | 1003 | GB |
|                                                                   |                        | <i>Rhinogobius similis</i>            | 2021 | 22 | 890  | GB |
|                                                                   |                        | <i>Proterorhinus semilunaris</i>      | 2022 | 23 | 865  | GB |
|                                                                   |                        | <i>Periophthalmus modestus</i>        | 2021 | NA | 854  | GB |
|                                                                   |                        | <i>Bostrychus sinensis</i>            | 2021 | 23 | 886  | GB |
|                                                                   |                        |                                       |      |    |      |    |
| <b>Spariiformes</b><br><br>WGS - 5 species<br>mtDNA - 27 species  | <b>Sparidae</b>        | <i>Sparus aurata</i>                  | 2018 | 24 | 833  | GB |
|                                                                   |                        | <i>Spondylisoma cantharus</i>         | 2018 | NA | 680  | GB |
|                                                                   |                        | <i>Pagrus major</i>                   | 2017 | NA | 875  | GB |
|                                                                   |                        | <i>Acanthopagrus latus</i>            | 2020 | 24 | 685  | GB |
|                                                                   |                        | <i>Diplodus sargus</i>                | 2020 | NA | 784  | GB |
| <b>Anguilliformes</b>                                             | <b>Anguillidae</b>     | <i>Anguilla rostrata</i>              | 2016 | NA | 1413 | GB |

|                                       |                      |                                |      |    |      |    |
|---------------------------------------|----------------------|--------------------------------|------|----|------|----|
| WGS - 6 species<br>mtDNA - 67 species |                      | <i>Anguilla japonica</i>       | 2013 | NA | 967  | GB |
|                                       |                      | <i>Anguilla anguilla</i>       | 2014 | NA | 1019 | GB |
|                                       |                      | <i>Anguilla megastoma</i>      | 2020 | NA | 878  | GB |
|                                       |                      | <i>Anguilla marmorata</i>      | 2020 | NA | 882  | GB |
|                                       |                      | <i>Anguilla obscura</i>        | 2020 | NA | 882  | GB |
| <b>Istiophoriformes</b>               | <b>Xiphiidae</b>     | <i>Xiphias gladius</i>         | 2021 | 24 | 692  | GB |
| WGS - 2 species<br>mtDNA - 12 species | <b>Istiophoridae</b> | <i>Istiophorus platypterus</i> | 2021 | 24 | 614  | GB |

<sup>a</sup>Chr = Number of chromosomes, NA = not available; <sup>b</sup>GB = GenBank (<https://www.ncbi.nlm.nih.gov/genbank/>), ENA = the European Nucleotide Archive ([www.ebi.ac.uk/ena](http://www.ebi.ac.uk/ena)), GigaDB = GigaDB Datasets (<http://gigadb.org/>)
